# Supplementary material for: The 2D:4D Marker and Different Forms of Internet Use Disorder
Source: PubMed Central journal article supplement (PMC5715388; doi:10.3389/fpsyt.2017.00213), 2017-11-20
Supplement: table_1.pdf [file table_1.pdf]

## Supplementary Material

**Table 1 | Descriptive hand ratio data of the entire sample and split by gender**

| variables         | Entire sample<br>$N_L = 208, N_R = 212$ |         |      |      |      |      | Females<br>$n_L = 137, n_R = 138$ |       | Males<br>$n_L = 71, n_R = 74$ |       |
|-------------------|-----------------------------------------|---------|------|------|------|------|-----------------------------------|-------|-------------------------------|-------|
|                   | M(all)                                  | SD(all) | SEM  | Min  | Max  | Skew | M(f)                              | SD(f) | M(m)                          | SD(m) |
| LEFT 2D:4D ratio  | 0.98                                    | 0.03    | 0.00 | 0.89 | 1.07 | 0.05 | 0.98                              | 0.03  | 0.97                          | 0.03  |
| RIGHT 2D:4D ratio | 0.97                                    | 0.03    | 0.00 | 0.90 | 1.05 | 0.04 | 0.98                              | 0.03  | 0.97                          | 0.03  |

Note. M (Mean), SD (Standard Deviation), SEM (Standard Error of the Mean)

**Table 2 | Age correlated with both hand ratios and Internet addiction variables for the entire sample and both genders using Spearman's rho**

|                                        | 2D:4D LEFT hands             |                        |                     | 2D:4D RIGHT hands            |                        |                           |
|----------------------------------------|------------------------------|------------------------|---------------------|------------------------------|------------------------|---------------------------|
|                                        | Entire sample<br>$N_L = 208$ | Females<br>$n_L = 137$ | Males<br>$n_L = 71$ | Entire sample<br>$N_R = 212$ | Females<br>$n_R = 138$ | Males<br>$n_R = 74$       |
| age                                    | 23.27 ±7.50                  | 22.61 ±6.80            | 24.55 ±8.61         | 23.45 ±7.85                  | 22.63 ±6.77            | 24.99 ±9.40               |
| 2D:4D hands ratios                     | -0.03                        | 0.06                   | -0.15               | 0.05                         | <b>0.19*</b>           | -0.10                     |
| s-IAT                                  | -0.13                        | -0.14                  | -0.18               | -0.10                        | -0.11                  | -0.15                     |
| s-IAT <sub>LoCTM</sub>                 | <b>-0.19**</b>               | <b>-0.19*</b>          | <b>-0.24*</b>       | <b>-0.17*</b>                | -0.17                  | <b>-0.23*<sup>d</sup></b> |
| s-IAT <sub>CSP</sub>                   | 0.02                         | 0.02                   | -0.04               | 0.04                         | 0.02                   | 0.00                      |
| <sup>a</sup> A1 s-IAT                  | -0.06                        | <b>-0.17*</b>          | -0.16               | -0.06                        | <b>-0.17*</b>          | -0.15                     |
| <sup>a</sup> A1 s-IAT <sub>LoCTM</sub> | -0.07                        | <b>-0.18*</b>          | -0.13               | -0.05                        | -0.16                  | -0.11                     |
| <sup>a</sup> A1 s-IAT <sub>CSP</sub>   | -0.04                        | -0.13                  | -0.15               | -0.05                        | -0.13                  | -0.16                     |
| A2 s-IAT                               | 0.10                         | 0.05                   | 0.08                | 0.10                         | 0.05                   | 0.07                      |
| <sup>c</sup> A2 s-IAT <sub>LoCTM</sub> | 0.05                         | <sup>c</sup> n.v.      | 0.03                | 0.05                         | <sup>c</sup> n.v.      | 0.03                      |
| A2 s-IAT <sub>CSP</sub>                | 0.06                         | 0.05                   | 0.01                | 0.05                         | 0.05                   | 0.00                      |
| <sup>b</sup> A3 s-IAT                  | 0.01                         | -0.07                  | 0.17                | 0.01                         | -0.07                  | 0.17                      |
| <sup>b</sup> A3 s-IAT <sub>LoCTM</sub> | 0.04                         | -0.01                  | 0.19                | 0.04                         | -0.02                  | 0.19                      |
| A3 s-IAT <sub>CSP</sub>                | -0.01                        | -0.10                  | 0.18                | 0.00                         | -0.09                  | 0.16                      |
| A4 s-IAT                               | -0.01                        | -0.16 ( $p = 0.06$ )   | -0.10               | 0.01                         | <b>-0.17*</b>          | -0.04                     |
| A4 s-IAT <sub>LoCTM</sub>              | 0.07                         | -0.04                  | -0.06               | 0.09                         | -0.05                  | -0.01                     |
| A4 s-IAT <sub>CSP</sub>                | -0.05                        | <b>-0.19*</b>          | -0.12               | -0.03                        | <b>-0.20*</b>          | -0.05                     |
| A5 s-IAT                               | <b>-0.19**</b>               | <b>-0.21*</b>          | -0.13               | <b>-0.18**</b>               | <b>-0.20*</b>          | -0.12                     |
| A5 s-IAT <sub>LoCTM</sub>              | <b>-0.20**</b>               | <b>-0.22*</b>          | -0.18               | <b>-0.19**</b>               | <b>-0.21*</b>          | -0.16                     |
| A5 s-IAT <sub>CSP</sub>                | -0.12                        | -0.16                  | -0.01               | -0.13                        | -0.15                  | -0.04                     |

Note. Correlation (2-tailed) is significant at the 0.01 level (\*\*), at the 0.05 level (\*); sub-facets of s-IAT: LoCTM (loss of control/time management), CSP (craving/social problems), s-IAT A1: online gaming, s-IAT A2: online gambling, s-IAT A3: online shopping, s-IAT A4: for online pornography, s-IAT A5: online communication.

<sup>a</sup> $N$  is reduced by 1 (one participant missed to enter their 4 values for A1 online gaming): for LEFT hands  $N_L = 207, N(f)_L = 136$ ; for RIGHT hands  $N_R = 211, N(f)_R = 137$

<sup>b</sup> $N$  is reduced by 1 (one participant missed to enter the 3<sup>rd</sup> item of the s-IAT A3 question set: online shopping, A3 s-IAT<sub>CSP</sub> remains unaffected): for LEFT hands  $N_L = 207, N(f)_L = 136$ ; for RIGHT hands  $N_R = 211, N(f)_R = 137$

<sup>c</sup>all female participants chose the lowest value:  $M = 2, SD = 0$

<sup>d</sup> $p = 0.05$

## The 2D:4D Marker and Different Forms of Internet Use Disorder

**Table 3 | Spearman's  $\rho$  of age correlated with each item of the s-IAT and the five scales (A1-A5) for the entire sample and both genders**

| s-IAT item no.       | 1                  | 2                  | 3                   | 4                  | 5                 | 6              | 7                 | 8                 | 9              | 10    | 11                | 12    |
|----------------------|--------------------|--------------------|---------------------|--------------------|-------------------|----------------|-------------------|-------------------|----------------|-------|-------------------|-------|
| All ( $N = 217$ )    | -0.10              | -0.13              | -0.12               | 0.09               | 0.04              | -0.06          | -0.05             | -0.12             | <b>-0.18**</b> | 0.02  | 0.08              | 0.03  |
| Female ( $n = 140$ ) | -0.15              | -0.16              | -0.06               | 0.10               | -0.02             | -0.05          | -0.08             | <b>-0.18*</b>     | <b>-0.17*</b>  | 0.02  | 0.04              | -0.01 |
| Male ( $n = 77$ )    | -0.02              | -0.14              | <b>-0.30**</b>      | -0.01              | 0.07              | -0.06          | -0.05             | -0.09             | -0.19          | 0.00  | 0.10              | -0.02 |
| Scales               | A1-1               | A1-2               | A1-3                | A1-4               | A2-1              | A2-2           | A2-3              | A2-4              | A3-1           | A3-2  | A3-3              | A3-4  |
| All ( $N = 217$ )    | <sup>a</sup> -0.03 | <sup>a</sup> -0.02 | <sup>a</sup> -0.01  | <sup>a</sup> -0.04 | 0.05              | 0.07           | 0.08              | 0.02              | 0.03           | 0.02  | 0.10              | -0.01 |
| Female ( $n = 140$ ) | <sup>a</sup> -0.15 | <sup>a</sup> -0.09 | <sup>a</sup> -0.008 | <sup>a</sup> -0.06 | <sup>c</sup> n.v. | 0.05           | <sup>c</sup> n.v. | <sup>c</sup> n.v. | -0.04          | -0.08 | <sup>b</sup> 0.03 | -0.09 |
| Male ( $n = 77$ )    | -0.10              | -0.12              | -0.07               | -0.17              | 0.02              | 0.03           | 0.10              | 0.00              | 0.16           | 0.21  | <b>0.25*</b>      | 0.14  |
| Scales               | A4-1               | A4-2               | A4-3                | A4-4               | A5-1              | A5-2           | A5-3              | A5-4              |                |       |                   |       |
| All ( $N = 217$ )    | 0.10               | -0.02              | 0.06                | 0.06               | <b>-0.16*</b>     | <b>-0.17**</b> | <b>-0.18**</b>    | 0.00              |                |       |                   |       |
| Female ( $n = 140$ ) | -0.03              | <b>-0.19*</b>      | 0.01                | 0.01               | <b>-0.17*</b>     | <b>-0.22**</b> | <b>-0.22**</b>    | -0.01             |                |       |                   |       |
| Male ( $n = 77$ )    | 0.01               | -0.05              | -0.05               | 0.02               | -0.11             | -0.06          | -0.11             | 0.06              |                |       |                   |       |

Note. Correlation (2-tailed) is significant at the 0.01 level (\*\*), at the 0.05 level (\*); greyish fields account for the sub facet LoCTM, white background for the sub facet CSP, <sup>a</sup> $N$  is reduced by 1 (one participant missed to enter their 4 values for A1 online gaming), <sup>b</sup> $N$  is reduced by 1 (one participant missed to enter the 3<sup>rd</sup> item of the s-IAT A3 question set: online shopping), <sup>c</sup>all female participants chose the lowest value:  $M = 2$ ,  $SD = 0$

**Table 4 | Spearman's  $\rho$ s between all IUD variables (s-IAT and scales A1 - A5) for the entire sample and both genders**

| IUD-VAR               | Entire sample ( $N = 217$ , <sup>a,b</sup> $N = 216$ ) |                       |              |                       |              |                    |          |          |               |               |
|-----------------------|--------------------------------------------------------|-----------------------|--------------|-----------------------|--------------|--------------------|----------|----------|---------------|---------------|
|                       | s-IAT                                                  | <sup>a</sup> A1 s-IAT | A2 s-IAT     | <sup>b</sup> A3 s-IAT | A4 s-IAT     |                    |          |          |               |               |
| <sup>a</sup> A1 s-IAT | <b>0.30**</b>                                          |                       |              |                       |              |                    |          |          |               |               |
| A2 s-IAT              | -0.01                                                  | <b>0.17*</b>          |              |                       |              |                    |          |          |               |               |
| <sup>b</sup> A3 s-IAT | <b>0.19**</b>                                          | 0.11                  | -0.03        |                       |              |                    |          |          |               |               |
| A4 s-IAT              | <b>0.31**</b>                                          | <b>0.33**</b>         | <b>0.17*</b> | 0.13 <sup>c</sup>     |              |                    |          |          |               |               |
| A5 s-IAT              | <b>0.40**</b>                                          | 0.04                  | 0.01         | <b>0.33**</b>         | 0.11         |                    |          |          |               |               |
| IUD-VAR               | Females ( $n = 140$ , <sup>a,b</sup> $n = 139$ )       |                       |              |                       |              | Males ( $n = 77$ ) |          |          |               |               |
|                       | s-IAT                                                  | <sup>a</sup> A1 s-IAT | A2 s-IAT     | <sup>b</sup> A3 s-IAT | A4 s-IAT     | s-IAT              | A1 s-IAT | A2 s-IAT | A3 s-IAT      | A4 s-IAT      |
| <sup>a</sup> A1 s-IAT | 0.15                                                   |                       |              |                       |              | <b>0.52**</b>      |          |          |               |               |
| A2 s-IAT              | -0.02                                                  | <b>0.18*</b>          |              |                       |              | -0.07              | 0.03     |          |               |               |
| <sup>b</sup> A3 s-IAT | <b>0.28**</b>                                          | <b>0.22**</b>         | -0.03        |                       |              | 0.03               | 0.07     | 0.03     |               |               |
| A4 s-IAT              | <b>0.28**</b>                                          | 0.10                  | 0.10         | <b>0.21*</b>          |              | <b>0.39**</b>      | 0.17     | -0.08    | <b>0.27*</b>  |               |
| A5 s-IAT              | <b>0.48**</b>                                          | 0.04                  | -0.08        | <b>0.21*</b>          | <b>0.19*</b> | <b>0.28*</b>       | 0.20     | 0.12     | <b>0.49**</b> | <b>0.40**</b> |

Note. IUD-VAR (Internet use disorder variable), Correlation (2-tailed) is significant at the 0.01 level (\*\*), at the 0.05 level (\*); s-IAT A1: online gaming, s-IAT A2: online gambling, s-IAT A3: online shopping, s-IAT A4: for online pornography, s-IAT A5: online communication.

<sup>a</sup> $N$  is reduced by 1 (one participant missed to enter their 4 values for A1 online gaming)

<sup>b</sup> $N$  is reduced by 1 (one participant missed to enter the 3<sup>rd</sup> item of the A3 s-IAT question set)

<sup>c</sup> $p = 0.05$

Table 5 | Partial correlation coefficients corrected by age between all IUD variables for the entire sample and both genders

|                       |               | Entire sample ( <i>df</i> = 212) |          |                       |          |          |
|-----------------------|---------------|----------------------------------|----------|-----------------------|----------|----------|
| IUD-VAR               | s-IAT         | <sup>a</sup> A1 s-IAT            | A2 s-IAT | <sup>b</sup> A3 s-IAT | A4 s-IAT | A5 s-IAT |
| <sup>a</sup> A1 s-IAT | <b>0.39**</b> |                                  |          |                       |          |          |
| A2 s-IAT              | 0.00          | <b>0.17*</b>                     |          |                       |          |          |
| <sup>b</sup> A3 s-IAT | <b>0.34**</b> | <b>0.19**</b>                    | -0.03    |                       |          |          |
| A4 s-IAT              | <b>0.39**</b> | <b>0.41**</b>                    | 0.07     | <b>0.20**</b>         |          |          |
| A5 s-IAT              | <b>0.40**</b> | 0.04                             | 0.11     | <b>0.34**</b>         | 0.11     |          |

  

|                       |               | Females ( <i>df</i> = 135) |              |                       |              | Males ( <i>df</i> = 74) |               |               |               |              |
|-----------------------|---------------|----------------------------|--------------|-----------------------|--------------|-------------------------|---------------|---------------|---------------|--------------|
| IUD-VAR               | s-IAT         | <sup>a</sup> A1 s-IAT      | A2 s-IAT     | <sup>b</sup> A3 s-IAT | A4 s-IAT     | s-IAT                   | A1 s-IAT      | A2 s-IAT      | A3 s-IAT      | A4 s-IAT     |
| <sup>a</sup> A1 s-IAT | 0.16          |                            |              |                       |              | <b>0.57**</b>           |               |               |               |              |
| A2 s-IAT              | -0.02         | 0.10                       |              |                       |              | -0.04                   | 0.07          |               |               |              |
| <sup>b</sup> A3 s-IAT | <b>0.34**</b> | <b>0.32**</b>              | -0.05        |                       |              | <b>0.39**</b>           | <b>0.24*</b>  | 0.01          |               |              |
| A4 s-IAT              | <b>0.28**</b> | 0.02                       | <b>0.19*</b> | 0.13                  |              | <b>0.53**</b>           | <b>0.30**</b> | -0.13         | <b>0.51**</b> |              |
| A5 s-IAT              | <b>0.50**</b> | 0.07                       | -0.07        | <b>0.25**</b>         | <b>0.21*</b> | <b>0.29*</b>            | 0.16          | <b>0.30**</b> | <b>0.51**</b> | <b>0.27*</b> |

Note. IUD-VAR (Internet use disorder variable), Correlation (2-tailed) is significant at the 0.01 level (\*\*), at the 0.05 level (\*);s-IAT A1: online gaming, s-IAT A2: online gambling, s-IAT A3: online shopping, s-IAT A4: for online pornography, s-IAT A5: online communication.

<sup>a</sup>N is reduced by 1 (one participant missed to enter their 4 values for A1 online gaming)

<sup>b</sup>N is reduced by 1 (one participant missed to enter the 3<sup>rd</sup> item of the A3 s-IAT question set)

A test for differences of finger ratios regarding the s-IAT cut-off value (30) stated in Pawlikowski et al. (2013) between both problematic (> 30) and unproblematic (≤ 30) Internet user groups. T-tests between the hands in the entire sample and both genders, respectively, did not reveal any differences (Table 6).

Table 6 | Differences of hand ratios between problematic and ordinary Internet user groups

| 2D:4D ratios                                                                                | Problematic Internet use:<br>s-IAT > 30 |           | Normal Internet use:<br>s-IAT ≤ 30 |           | T-test         |          |
|---------------------------------------------------------------------------------------------|-----------------------------------------|-----------|------------------------------------|-----------|----------------|----------|
|                                                                                             | <i>M</i>                                | <i>SD</i> | <i>M</i>                           | <i>SD</i> | <i>T-score</i> | <i>p</i> |
| <b>Left hands:</b> <i>N<sub>L</sub></i> = 208, <i>n</i> (> 30) = 36, <i>n</i> (≤ 30) = 172  | 0.97                                    | 0.03      | 0.98                               | 0.03      | -0.28          | .078     |
| <b>Females:</b> <i>n<sub>L</sub></i> = 137, <i>n</i> (> 30) = 23, <i>n</i> (≤ 30) = 114     | 0.97                                    | 0.03      | 0.98                               | 0.03      | -0.62          | 0.54     |
| <b>Males:</b> <i>n<sub>L</sub></i> = 71, <i>n</i> (> 30) = 13, <i>n</i> (≤ 30) = 58         | 0.98                                    | 0.03      | 0.97                               | 0.03      | 0.43           | 0.67     |
| <b>Right hands:</b> <i>N<sub>R</sub></i> = 212, <i>n</i> (> 30) = 35, <i>n</i> (≤ 30) = 177 | 0.97                                    | 0.04      | 0.97                               | 0.03      | -1.26          | 0.21     |
| <b>Females:</b> <i>n</i> = 138, <i>n</i> (> 30) = 23, <i>n</i> (≤ 30) = 115                 | 0.97                                    | 0.04      | 0.98                               | 0.03      | -0.56          | 0.58     |
| <b>Males:</b> <i>n</i> = 74, <i>n</i> (> 30) = 12, <i>n</i> (≤ 30) = 62                     | 0.95                                    | 0.03      | 0.97                               | 0.03      | -1.49          | 0.14     |
